# Supplementary material for: Characterisation of ethylene pathway components in non-climacteric capsicum
Source: PubMed Central journal article supplement (PMC4219378; doi:10.1186/1471-2229-13-191), 2013-11-28
Supplement: 1471-2229-13-191-S1.pdf [file 1471-2229-13-191-S1.pdf]

| Gene/ isoform names           | NCBI accession numbers for tomato ( <i>Le</i> ) | Contig accession numbers for capsicum ( <i>Ca</i> ) <sup>g</sup> | NCBI accession numbers for capsicum ( <i>Ca</i> ) | Forward primer (5'-3')   | Reverse primer (5'-3')    | Product size |
|-------------------------------|-------------------------------------------------|------------------------------------------------------------------|---------------------------------------------------|--------------------------|---------------------------|--------------|
| <i>GAPdH</i> <sup>a</sup>     | -                                               | -                                                                | AJ246011.1                                        | GAAGAATTGGTTCGATTGGTG    | CCCCGTTGACTCTACGACAT      | 272          |
| <i>ACO1</i>                   | NM_001247095.1                                  | TC13435                                                          | GD053075.1 & GD054188.1                           | GCAAGTGCTTAAATTACAAGTGTG | TTGAGATGCAACCGTTACTCC     | 195          |
| <i>ACO2</i>                   | XM_004251479.1                                  | TC14180                                                          | GD052945.1, GD054373.1 & CA520300.1               | GTTGAGAAAAGAGGCCAAAGGAT  | AAATAATCTTGAGTTTGAATGTACG | 188          |
| <i>ACO3</i>                   | NM_001246999.1                                  | TC12536                                                          | GD095125.1 & BM063409.1                           | ATCCAGCACCAGCTTTGATC     | TGAATTGGAAAATTAAGCACTTG   | 193          |
| <i>ACO4</i>                   | AB013101.1                                      | -                                                                | JX515597                                          | GCAATGAAGGCTATGGAGACTA   | TGACGCATCAAGAAACACAAG     | 217          |
| <i>ACO5</i> <sup>b</sup>      | AJ715790.1                                      | TC15257                                                          | GD115323.1 & GD117950.1                           | GGACATTCCACCTTCCAAGA     | AGAGCTTTGGTGCTGGAGAA      | 188          |
| <i>ACO6</i>                   | EF501822.1                                      | TC24188                                                          | GD089267.1, GD124776.1, GD101463.1 & GD099075.1   | GGAGCCAAGGTTTGAAGCA      | CATCACACTACCAGACAACAGTACA | 259          |
| <i>ACS1</i> <sup>c</sup>      | NM_001246993.1 (A) and U72390.1 (B)             | -                                                                | AB434926.1                                        | AAGTTGTTCGATGAAATGATTGG  | CTAGCGATGTCCACTACTGTATCA  | 136          |
| <i>ACS2</i> <sup>c</sup>      | NM_001247249.1                                  | -                                                                | AB434927.1                                        | GTAGAAGACAACGAAATGAGTCAT | CGCAACTAACGACAGCATC       | 133          |
| <i>ACS3</i> <sup>b</sup>      | NM_001247097.1                                  | KS23061E03                                                       | GD116714.1                                        | CTTGAACCTCCTTACATTCCG    | AACTCGTTCCCAAACATCTGT     | 156          |
| <i>ACS4</i> <sup>d</sup>      | NM_001246946.1                                  | -                                                                | -                                                 | CCATCTTGTTTTCGACGAAATA   | CGATGCTAACGAAATTTGGAGAA   | -            |
| <i>ACSdeg</i> <sup>f</sup>    | accordingly                                     | -                                                                | -                                                 | ATGGGTNTNGCNGAAAATCA     | AANGCATCNCCNGGNTNAG       | 287          |
| <i>ETR2</i> <sup>e</sup>      | NM_001247224.1                                  | -                                                                | -                                                 | GGAACCAATGAGGGCTCG       | CAGCCAGGAAATCATTACGC      | 107          |
| <i>ETR3</i> <sup>b</sup>      | NM_001246965.1                                  | KS16036C11                                                       | GD072810.1                                        | AGAGTCCATGCGAGCCCA       | CTTCTTGTCGAGCTACATCCAA    | 68           |
| <i>ETR4</i> <sup>b</sup>      | NM_001247276.1                                  | KS20049F06 & TC15606                                             | GD097854.1 & GD101436.1                           | TTGGGATGCAGCGTGTCT       | AAGGACGATTTGGAATGAGG      | 87           |
| <i>ETR5</i> <sup>b</sup>      | NM_001247283.1                                  | TC12426                                                          | GD063530.1 & GD052924.1                           | CTTCATGTACTCGTTGCTGATG   | CTAAAGCACTCAGGCATTGG      | 121          |
| <i>ETR1-3deg</i> <sup>f</sup> | accordingly                                     | -                                                                | -                                                 | AGATCAGGTNGCTGTNGCTC     | GCATNGGNGTTCNCATTTCAT     | 179          |
| <i>ETR4-6deg</i> <sup>f</sup> | accordingly                                     | -                                                                | -                                                 | TGATGATGTNAATAGANNNGTAAC | TCNGGCANNTGAAGATCCAA      | 150          |

<sup>a</sup>*CaGAPdH* primers were obtained from other studies detailed in the manuscript.

<sup>b</sup>Contig sequences for *CaACO5*, *CaACS3*, *CaETR3*, *CaETR4* and *CaETR5* are partial and not encoded for full-length proteins.

<sup>c</sup>*CaACS1* and *CaACS2* sequences are from *Capsicum chinense* obtained through the NCBI database (similar EST sequences were also obtained from the capsicum EST database). For the tomato *ACS1*, there are two different isoforms exist named *LeACS1A* and *LeACS1B*. However, only one isoform is available for capsicum which is closely related to both tomato *ACS1* isoforms (Additional file 2: Figure S1). Hence, the capsicum *ACS1* is named *CaACS1*.

<sup>d</sup>Primers for *CaACS4* were obtained from previous qPCR study in capsicum and no other information regarding its sequences are available in both NCBI and EST databases (detailed in manuscript).

<sup>e</sup>*CaETR2* was extracted from the degenerate primers (*ETR1-3deg*).

<sup>f</sup>Degenerate primers for *ACS* (*ACSdeg*) were designed based on consensus sequence of *LeACS3*, *LeACS4*, *LeACS5*, *LeACS6*, *LeACS7* and *LeACS8* and the degenerate primers for *ETR* (*ETR1-3deg* and *ETR4-6deg*) were designed based on the consensus sequences of tomato Type I (*LeETR1*, *LeETR2*, *LeETR3*) and Type II (*LeETR4*, *LeETR5*, *LeETR6*), respectively. Any available capsicum EST sequences were also taken into consideration when designing these primers.

<sup>g</sup>Contig accession numbers were obtained from the EST database which are linked to the NCBI dbEST database (some of them have more than one dbEST accessions as listed in Genbank accession numbers column of the table).
