# Supplementary material for: Characterisation of ethylene pathway components in non-climacteric capsicum
Source: PubMed Central journal article supplement (PMC4219378; doi:10.1186/1471-2229-13-191), 2013-11-28
Supplement: 1471-2229-13-191-S2.pdf [file 1471-2229-13-191-S2.pdf]

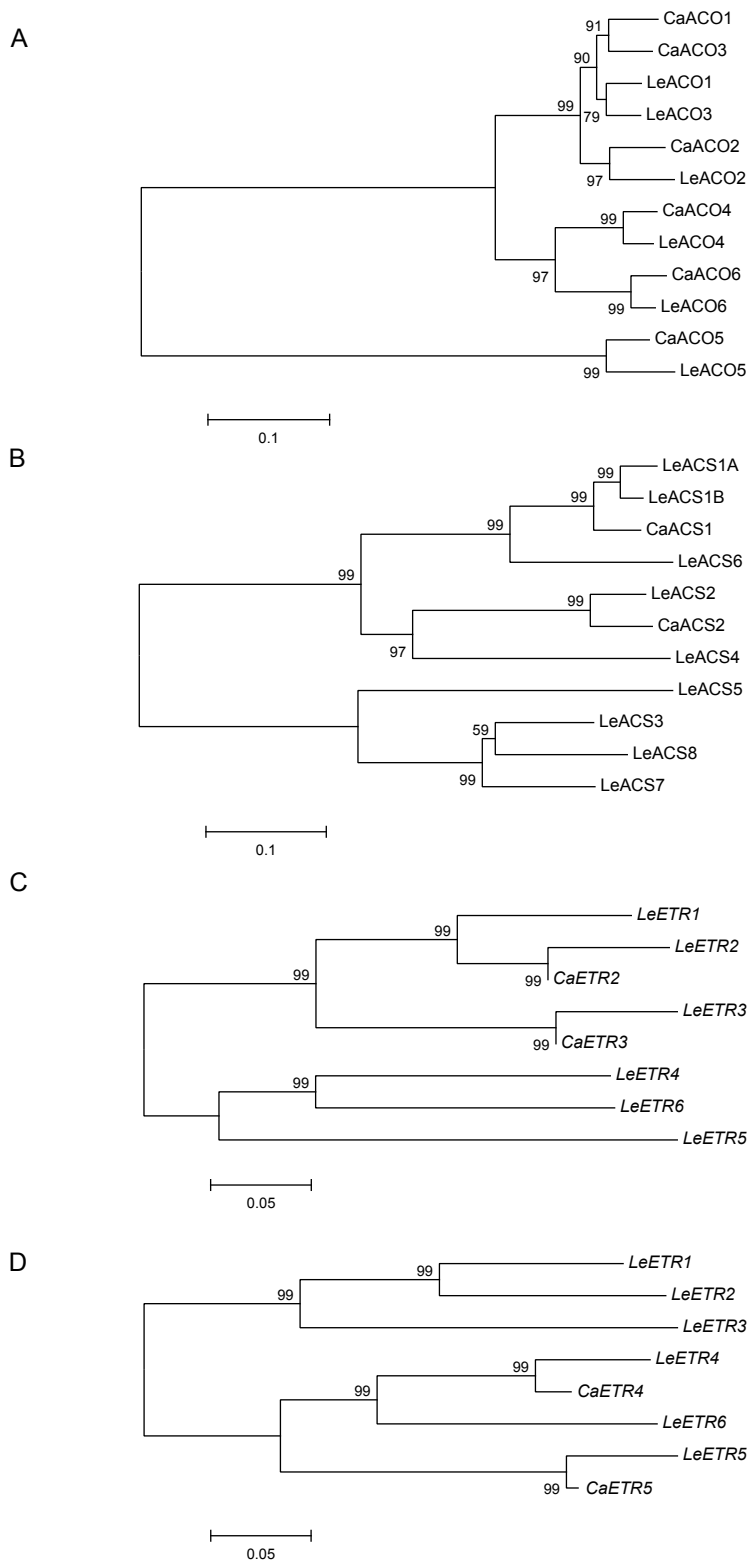

**Additional file 2:Figure S1. The phylogenetic analysis of ACO (A), ACS (B) and ETR (C and D) isoforms.**

The tree was built based on full-length protein sequences of ACO isoforms (except CaACO5 which is partial), and the full length of ACS isoforms. The tree for ETRs was built based on mRNA sequences of tomato and the partial sequence of capsicum ETRs Type I (*CaETR2* and *CaETR3*, C) and Type II (*CaETR4* and *CaETR5*, D) obtained from an end point RT-PCR using degenerate primers for respective types (refer to Methods). Genbank accession numbers for the tomato are: *LeACO1*, P05116.2; *LeACO2*, CAA68538.1; *LeACO3*, CAA90904.1; *LeACO4*, NP\_001233867.1; *LeACO5*, NP\_001234037.1; *LeACO6*, ABP68407.1; *LeACS1A*, NP\_001233922.1; *LeACS1B*, AAB17279.1; *LeACS2*, NP\_001234178.1; *LeACS3*, NP\_001234026.1; *LeACS4*, NP\_001233875.1; *LeACS5*, NP\_001234156.1; *LeACS6*, BAA34923.1; *LeACS7*, NP\_001234346.1; *LeACS8*, NP\_001234160.1; *LeETR1*, NM\_001247220.1; *LeETR2*, NM\_001247224.1; *LeETR3*, NM\_001246965.1; *LeETR4*, NM\_001247276.1; *LeETR5*, NM\_001247283.1 and *LeETR6*, NM\_001247221.1. For capsicum, the available Genbank accession numbers are: *CaACO4*, AGG20315; *CaACS1*, BAG30909.1 and *CaACS2*, BAG30910.1. All other capsicum isoforms (from contigs of the EST database) are listed in Additional file 1: Table S1 translated *in silico* as per [16]. Le, tomato; Ca, Capsicum.
