# Supplementary material for: Characterisation of ethylene pathway components in non-climacteric capsicum
Source: PubMed Central journal article supplement (PMC4219378; doi:10.1186/1471-2229-13-191), 2013-11-28
Supplement: 1471-2229-13-191-S4.pdf [file 1471-2229-13-191-S4.pdf]

**Additional file 4: Table S2. Significant levels of ASTA level (Figure 2B), ACO activity (Figure 3A), ACS activity (Figure 3B) and ACC content (Figure 3C) were determined using Duncan's Multiple Range Test ( $P<0.05$ ).** This analysis compares all data for control (C), ethylene (E) and 1-MCP (M) treated fruit at different days after treatment (DAT) within the respective ripening stage.

| Stages  | DAT | ASTA |     |     | ACO activity |      |     | ACS activity |      |      | ACC content |      |       |
|---------|-----|------|-----|-----|--------------|------|-----|--------------|------|------|-------------|------|-------|
|         |     | C    | E   | M   | C            | E    | M   | C            | E    | M    | C           | E    | M     |
| Green   | 0   | a    | a   | a   | bcde         | ab   | ef  | a            | a    | a    | ab          | a    | cde   |
|         | 3   | a    | a   | a   | cdef         | cdef | f   | ab           | a    | a    | ab          | abc  | abc   |
|         | 12  | a    | a   | a   | bc           | bc   | bcd | a            | a    | ab   | abcd        | abcd | bcde  |
|         | 20  | a    | ab  | a   | a            | a    | ab  | c            | bc   | c    | cde         | bcde | abcde |
|         | 28  | bc   | c   | c   | cdef         | def  | f   | cd           | d    | cd   | de          | f    | ef    |
| Breaker | 0   | ab   | a   | a   | a            | b    | c   | abcd         | ab   | ab   | a           | a    | a     |
|         | 3   | cd   | cde | abc | de           | ef   | cd  | ab           | a    | abc  | a           | a    | a     |
|         | 12  | ef   | def | bcd | fg           | fg   | fg  | abcd         | abcd | abcd | ab          | a    | abc   |
|         | 20  | g    | g   | f   | g            | g    | g   | cd           | d    | abcd | abc         | bcd  | ab    |
|         | 28  | g    | g   | g   | g            | g    | g   | abcd         | abcd | bcd  | d           | abc  | cd    |
